# Supplementary material for: Discovery of New Microbial Collagenase Inhibitors
Source: MDPI journal article supplement (doi:10.3390/life12122114), 2022-12-15
Supplement: s1 [file s1]

# Discovery of New Microbial Collagenase Inhibitors

Georgiana Nitulescu <sup>1</sup>, Dragos Paul Mihai <sup>1,\*</sup>, Anca Zanfirescu <sup>1</sup>, Miruna Silvia Stan <sup>2,3</sup>, Daniela Gradinaru <sup>1</sup> and George Mihai Nitulescu <sup>1</sup>

<sup>1</sup> Faculty of Pharmacy, "Carol Davila" University of Medicine and Pharmacy, Traian Vuia 6, Bucharest 020956, Romania

<sup>2</sup> Department of Biochemistry and Molecular Biology, Faculty of Biology, University of Bucharest, 91–95 Spl. Independentei, Bucharest 050095, Romania

<sup>3</sup> Research Institute of the University of Bucharest (ICUB), University of Bucharest, Bucharest 050657, Romania

\* Correspondence: dragos\_mihai@umfcd.ro

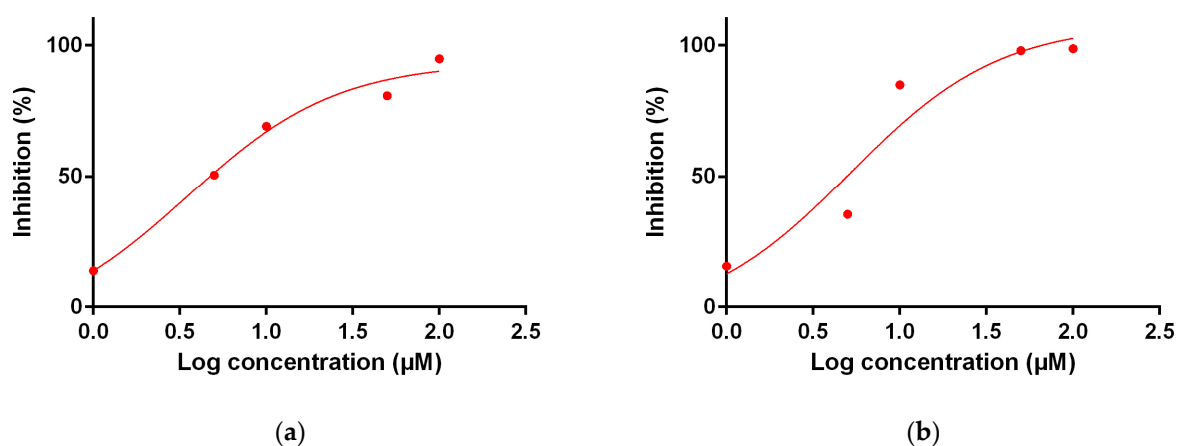

**Figure S1.** The inhibitory effect of two compounds on ColA after 30 min. (a) juglone; (b) palmatine chloride.

**Table S1.** The percentage inhibition on ColA after 30 min of incubation at 100 μM.

| Compound                                                              | Inhibition (%) |
|-----------------------------------------------------------------------|----------------|
| 1,2,3,4-tetrahydro-beta-carboline-1-carboxylic acid                   | 1.5            |
| 1,2-diaminoanthraquinone                                              | 4.3            |
| 1,4-dihydroxyanthraquinone                                            | 3.2            |
| 1-[[3-(trifluoromethyl)phenyl]sulfonyl]-2-pyrrolidinecarboxylic acid  | 0.7            |
| 2'-hydroxychalcone                                                    | 87.8           |
| 3,6-dihydroxyflavone                                                  | 2.7            |
| 3-hydroxycinnamic acid                                                | 0.8            |
| 3-hydroxyflavone                                                      | 27.6           |
| 3-phenyl-1H-2-benzopyran-1-one                                        | 0.2            |
| 4',5-dihydroxyflavone                                                 | 15             |
| 4,6-dihydroxy-2-mercaptopyrimidine                                    | -7.2           |
| 4'-methoxyflavonol                                                    | 3.7            |
| 4-methylphenylsulfonylurea                                            | 19.6           |
| 6-hydroxycoumarin                                                     | 12.5           |
| 6-methoxy-1,2,3,4-tetrahydro-9H-pyrido[3,4-b]indole-1-carboxylic acid | 18.8           |
| 6-methoxyflavonol                                                     | 10.7           |
| acamprosate calcium                                                   | 17.2           |

---

|                                              |        |
|----------------------------------------------|--------|
| acetohexamide                                | 16.6   |
| acetylcysteine                               | 3.4    |
| aloin                                        | 4.4    |
| apigenin                                     | 2.7    |
| argatroban                                   | -12.3  |
| artemisinin                                  | 5.6    |
| bendroflumethiazide                          | 21.6   |
| benfotiamine                                 | -20.4  |
| benzoyl-L-arginine ethyl ester hydrochloride | -6.6   |
| berberine                                    | -2.5   |
| biochanin A                                  | 57.9   |
| caffeic acid                                 | -3.8   |
| cantharidin                                  | 26.8   |
| capsaicin                                    | 87.9 * |
| captopril                                    | 5.2    |
| chlorogenic acid                             | 4.8    |
| chrysin                                      | -3.4   |
| chrysophanol                                 | -11.1  |
| citrulline                                   | 6.8    |
| curcumin                                     | 102.1  |
| cysteamine hydrochloride                     | 2.8    |
| cysteine                                     | 1.7    |
| daidzein                                     | 5.8    |
| daidzein dimethyl ether                      | 15.7   |
| dihydorobinetin                              | 96.9 * |
| epicatechin                                  | 3.6    |
| esculetin                                    | 11.8   |
| etidronic acid                               | 23     |
| ferulic acid                                 | 0.5    |
| Fmoc-L-citrulline                            | 20.8   |
| gallic acid                                  | -21.4  |
| genistein                                    | -1.1   |
| isorhamnetin                                 | 19.9   |
| isoxicam                                     | -10.1  |
| juglone                                      | 89.9   |
| L-alanine                                    | 3.1    |
| L-arginine                                   | -12.7  |
| lawsone                                      | -6.1   |
| meso-2,3-dimercaptosuccinic acid             | 25.6   |
| myricetin                                    | 27.6   |
| myricitrin                                   | 26.1   |
| N-(3-chlorophenylsulfonyl)-DL-alanine        | -19.2  |
| nalp-sulfonyl-L-arginine                     | 24.8   |
| nimesulide                                   | -2.2   |
| palmitate                                    | 103.4  |
| piperine                                     | 81.1 * |
| plumbagin                                    | -7.7   |
| podophyllotoxin                              | -9.7   |

---

---

|                                   |       |
|-----------------------------------|-------|
| potassium clavulanate             | -8.1  |
| primuletin                        | 33.1  |
| rhein                             | 78.5  |
| S-(acetamidomethyl)-L-cysteine    | -15.2 |
| shikimic acid                     | -0.2  |
| sodium 2- mercaptoethanesulfonate | 20.6  |
| sulbactam                         | -10.7 |
| tazobactam                        | 18.7  |
| tetrahydronorharman               | 21.3  |
| trihydroxyethylrutin              | 1.3   |
| umbelliferone                     | -10.2 |
| usnic acid                        | 3.9   |

(\*) the compounds precipitated due to their low solubility
